# Supplementary material for: Zone analysis by two-dimensional electrophoresis with accelerator mass spectrometry of in vivo protein bindings of idiosyncratic hepatotoxicants troglitazone and flutamide bioactivated in chimeric mice with humanized liver
Source: Royal Society of Chemistry journal article supplement (doi:10.1039/c4tx00068d), 2014-09-10
Supplement: c4tx00068d1.pdf [file c4tx00068d1.pdf]

**Zone analysis by two-dimensional electrophoresis with accelerator mass spectrometry of *in vivo* protein bindings of idiosyncratic hepatotoxicants troglitazone and flutamide bioactivated in chimeric mice with humanized liver**

Hiroshi Yamazaki,<sup>\*a</sup> Shunji Kuribayashi,<sup>b</sup> Tae Inoue,<sup>c</sup> Tomohiro Honda,<sup>d</sup> Chise Tateno,<sup>c</sup> Ken Oofusa,<sup>e</sup> Shinichi Ninomiya,<sup>f</sup> Toshihiko Ikeda,<sup>g</sup> Takashi Izumi<sup>d</sup> and Toru Horie<sup>h</sup>

<sup>a</sup> Showa Pharmaceutical University, Machida, Japan. E-mail: hyamazak@ac.shoyaku.ac.jp

<sup>b</sup> Otsuka Pharmaceutical Factory, Inc., Naruto, Japan

<sup>c</sup> PhoenixBio, Co., Higashi-Hiroshima, Hiroshima 739-0046, Japan

<sup>d</sup> Daiichi Sanyo, Co., Shinagawa-ku, Japan

<sup>e</sup> Idea Consultants Inc., Suminoe-ku, Osaka 559-8519, Japan

<sup>f</sup> Sekisui Medical Co., Chuo-ku, Japan

<sup>g</sup> Yokohama College of Pharmacy, Totsuka-ku, Yokohama 245-0066, Japan

<sup>h</sup> Drug Discovery and Development Institute, Tsukuba, Japan

*Toxicol. Res.*, 2015, **4**, 106–111, DOI: [10.1039/C4TX00068D](https://doi.org/10.1039/C4TX00068D)

We would like to confirm that there is no Electronic supplementary information (ESI) associated with this article and apologise for any inconvenience experienced.
